# Supplementary material
Source: HighWire-hosted journal article supplement (https://jitc.bmj.com/content/7/1/133)
Supplement: media-5 [file media-5.pdf]

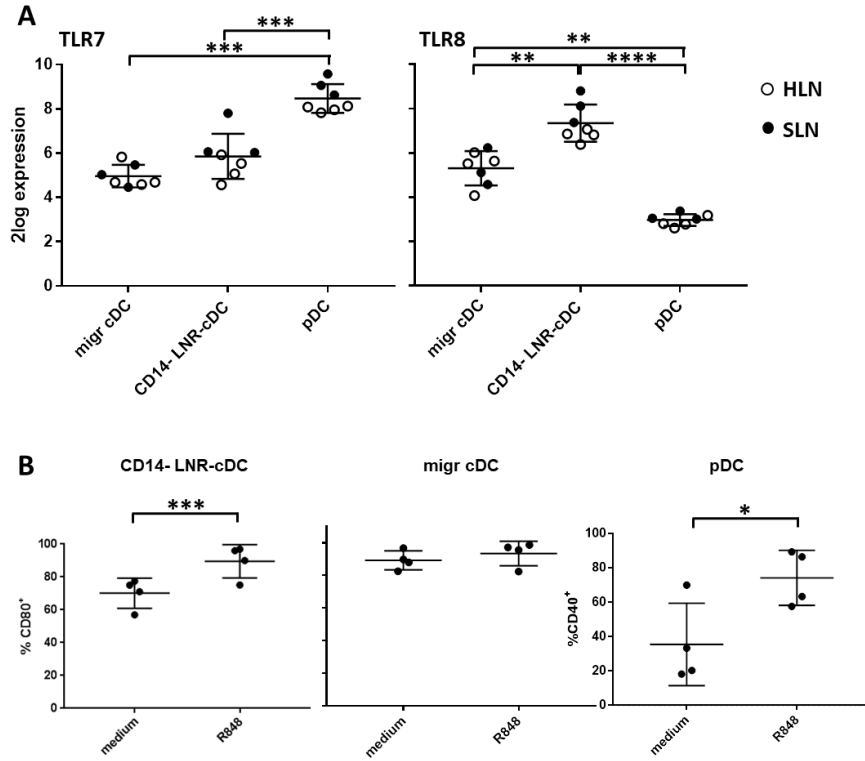

**Supplementary Figure 4. TLR7 and TLR8 expression in LN DC subsets and R848-induced activation in tumor negative BrC SLN.** A) Microarray data of TLR7 and TLR8 mRNA expression in SLN DC subsets. Affymetrix chip and Experimental Quality Analyses were performed using the Expression Console Software v1.4.1.46. Signals were log 2 transformed; Healthy lymph nodes (HLN) n=3, open symbols; SLN n=4, closed symbols. B) Activation of cDC and pDC subsets (by flowcytometric analysis of CD80 and CD40, respectively) by 2-day culture of SLN single-cell suspensions with 10 µg/mL R848 (n=4). \* p = 0.01 to 0.05; \*\* p = 0.001 to 0.01; \*\*\* 0.0001 to 0.001; \*\*\*\*<0.0001 in an unpaired (two-tailed) T test.
